# Supplementary material
Source: PubMed Central journal article supplement (PMC8135056)
Supplement: jamasurg-e211642-s003.pdf [file jamasurg-e211642-s003.pdf]

## Data Sharing Statement

Rovers. Perioperative Systemic Therapy vs Cytoreductive Surgery and Hyperthermic Intraperitoneal Chemotherapy Alone for Resectable Colorectal Peritoneal Metastases. *JAMA Surg.* Published May 19, 2021. doi:10.1001/jamasurg.2021.1642

### Data

**Data available:** Yes

**Data types:** Deidentified participant data

**How to access data:** [ignace.d.hingh@catharinaziekenhuis.nl](mailto:ignace.d.hingh@catharinaziekenhuis.nl)

**When available:** With publication

### Supporting Documents

**Document types:** None

### Additional Information

**Who can access the data:** Researchers whose proposed use of the data has been approved

**Types of analyses:** For a specified purpose

**Mechanisms of data availability:** After approval of a proposal and with a signed data access agreement
