# Supplementary material
Source: PubMed Central journal article supplement (PMC8135056)
Supplement: jamasurg-e211642-s004.pdf [file jamasurg-e211642-s004.pdf]

\*Indicates required information. Only first name, last name, and suffix will appear in PubMed.

| <b>Group Name(s):* Dutch Peritoneal Oncology Group and Dutch Colorectal Cancer Group</b> |                  |                       |                  |                                                     |                                          |                                                         |                                                                                            |
|------------------------------------------------------------------------------------------|------------------|-----------------------|------------------|-----------------------------------------------------|------------------------------------------|---------------------------------------------------------|--------------------------------------------------------------------------------------------|
| First Name and Middle Initial(s)*                                                        | Last Name*       | Suffix (eg, Jr, III)* | Academic Degrees | Institution                                         | Location (city, state/province, country) | Role or Contribution, eg, chair, principal investigator | Group (if more than 1 Group listed in the byline) and/or Subgroup (eg, Steering Committee) |
| Jeanette M                                                                               | Bouma            |                       | MSc              | Netherlands Comprehensive Cancer Organization       | Utrecht, Netherlands                     |                                                         |                                                                                            |
| Vincent CJ                                                                               | van de Vlasakker |                       | BSc              | Catharina Cancer Institute                          | Eindhoven, Netherlands                   |                                                         |                                                                                            |
| Robin J                                                                                  | Lurvink          |                       | MD               | Catharina Cancer Institute                          | Eindhoven, Netherlands                   |                                                         |                                                                                            |
| Geert AAM                                                                                | Simkens          |                       | PhD              | Catharina Cancer Institute                          | Eindhoven, Netherlands                   |                                                         |                                                                                            |
| Johanne G                                                                                | Bloemen          |                       | PhD              | Catharina Cancer Institute                          | Eindhoven, Netherlands                   |                                                         |                                                                                            |
| Jeroen EH                                                                                | Ponten           |                       | PhD              | Catharina Cancer Institute                          | Eindhoven, Netherlands                   |                                                         |                                                                                            |
| Jennifer                                                                                 | Demelinne        |                       |                  | Catharina Cancer Institute                          | Eindhoven, Netherlands                   |                                                         |                                                                                            |
| Birgit EPJ                                                                               | Vriens           |                       | PhD              | Catharina Cancer Institute                          | Eindhoven, Netherlands                   |                                                         |                                                                                            |
| Joost                                                                                    | Rothbarth        |                       | PhD              | Erasmus MC Cancer Institute                         | Rotterdam, Netherlands                   |                                                         |                                                                                            |
| Ninos                                                                                    | Ayez             |                       | PhD              | Erasmus MC Cancer Institute                         | Rotterdam, Netherlands                   |                                                         |                                                                                            |
| Nadine L                                                                                 | de Boer          |                       | MD               | Erasmus MC Cancer Institute                         | Rotterdam, Netherlands                   |                                                         |                                                                                            |
| Job P                                                                                    | van Kooten       |                       | MD               | Erasmus MC Cancer Institute                         | Rotterdam, Netherlands                   |                                                         |                                                                                            |
| Marjolein                                                                                | Diepeveen        |                       |                  | Erasmus MC Cancer Institute                         | Rotterdam, Netherlands                   |                                                         |                                                                                            |
| Mark                                                                                     | Tenhagen         |                       | MD               | Amsterdam University Medical Centers, location VUMC | Amsterdam, Netherlands                   |                                                         |                                                                                            |

## Supplemental Online Content: Nonauthor Collaborators

\*Indicates required information. Only first name, last name, and suffix will appear in PubMed.

| First Name and Middle Initial(s)* | Last Name*     | Suffix (eg, Jr, III)* | Academic Degrees | Institution                                         | Location (city, state/province, country) | Role or Contribution, eg, chair, principal investigator | Group (if more than 1 Group listed in the byline) and/or Subgroup (eg, Steering Committee) |
|-----------------------------------|----------------|-----------------------|------------------|-----------------------------------------------------|------------------------------------------|---------------------------------------------------------|--------------------------------------------------------------------------------------------|
| Sander                            | Bach           |                       | MD               | Amsterdam University Medical Centers, location VUMC | Amsterdam, Netherlands                   |                                                         |                                                                                            |
| Stefan E                          | van Oostendorp |                       | MD               | Amsterdam University Medical Centers, location VUMC | Amsterdam, Netherlands                   |                                                         |                                                                                            |
| Lisanne JH                        | Smits          |                       | MD               | Amsterdam University Medical Centers, location VUMC | Amsterdam, Netherlands                   |                                                         |                                                                                            |
| Nina R                            | Sluiter        |                       | PhD              | Amsterdam University Medical Centers, location VUMC | Amsterdam, Netherlands                   |                                                         |                                                                                            |
| Sacha                             | Spoor          |                       |                  | Amsterdam University Medical Centers, location VUMC | Amsterdam, Netherlands                   |                                                         |                                                                                            |
| Hans J                            | van der Vliet  |                       | PhD              | Amsterdam University Medical Centers, location VUMC | Amsterdam, Netherlands                   |                                                         |                                                                                            |
| Koert FD                          | Kuhlmann       |                       | PhD              | Netherlands Cancer Institute                        | Amsterdam, Netherlands                   |                                                         |                                                                                            |
| Brechtje A                        | Grotenhuis     |                       | PhD              | Netherlands Cancer Institute                        | Amsterdam, Netherlands                   |                                                         |                                                                                            |
| Charlotte J                       | Verberne       |                       | PhD              | Netherlands Cancer Institute                        | Amsterdam, Netherlands                   |                                                         |                                                                                            |
| Patricia D                        | Bottenberg     |                       |                  | Netherlands Cancer Institute                        | Amsterdam, Netherlands                   |                                                         |                                                                                            |
| Myriam                            | Chalabi        |                       | MD               | Netherlands Cancer Institute                        | Amsterdam, Netherlands                   |                                                         |                                                                                            |
| Emma CE                           | Wassenaar      |                       | MD               | Sint Antonius Hospital                              | Nieuwegein, Netherlands                  |                                                         |                                                                                            |
| Paulien                           | Rauwerdink     |                       | MD               | Sint Antonius Hospital                              | Nieuwegein, Netherlands                  |                                                         |                                                                                            |
| Mendy SM                          | Hermans        |                       |                  | Sint Antonius Hospital                              | Nieuwegein, Netherlands                  |                                                         |                                                                                            |
| Karin H                           | Herbschleb     |                       | MD               | Sint Antonius Hospital                              | Nieuwegein, Netherlands                  |                                                         |                                                                                            |

## Supplemental Online Content: Nonauthor Collaborators

\*Indicates required information. Only first name, last name, and suffix will appear in PubMed.

| First Name and Middle Initial(s)* | Last Name* | Suffix (eg, Jr, III)* | Academic Degrees | Institution                         | Location (city, state/province, country) | Role or Contribution, eg, chair, principal investigator | Group (if more than 1 Group listed in the byline) and/or Subgroup (eg, Steering Committee) |
|-----------------------------------|------------|-----------------------|------------------|-------------------------------------|------------------------------------------|---------------------------------------------------------|--------------------------------------------------------------------------------------------|
| Johannes HW                       | de Wilt    |                       | PhD              | Radboud University Medical Center   | Nijmegen, Netherlands                    |                                                         |                                                                                            |
| Fortuné MK                        | Elekonawo  |                       | PhD              | Radboud University Medical Center   | Nijmegen, Netherlands                    |                                                         |                                                                                            |
| Jan Marie                         | de Gooyer  |                       | MD               | Radboud University Medical Center   | Nijmegen, Netherlands                    |                                                         |                                                                                            |
| Nanneke                           | Meijer     |                       |                  | Radboud University Medical Center   | Nijmegen, Netherlands                    |                                                         |                                                                                            |
| Lukas B                           | Been       |                       | PhD              | University Medical Center Groningen | Groningen, Netherlands                   |                                                         |                                                                                            |
| Robert J                          | van Ginkel |                       | PhD              | University Medical Center Groningen | Groningen, Netherlands                   |                                                         |                                                                                            |
| Frederik JH                       | Hoogwater  |                       | PhD              | University Medical Center Groningen | Groningen, Netherlands                   |                                                         |                                                                                            |
| Judith EKR                        | Hentzen    |                       | PhD              | University Medical Center Groningen | Groningen, Netherlands                   |                                                         |                                                                                            |
| Linde                             | Olsder     |                       |                  | University Medical Center Groningen | Groningen, Netherlands                   |                                                         |                                                                                            |
| Rudolf SN                         | Fehrmann   |                       | PhD              | University Medical Center Groningen | Groningen, Netherlands                   |                                                         |                                                                                            |
| Karin K                           | van Diepen |                       |                  | University Medical Center Utrecht   | Utrecht, Netherlands                     |                                                         |                                                                                            |
| Jeanine ML                        | Roodhart   |                       | PhD              | University Medical Center Utrecht   | Utrecht, Netherlands                     |                                                         |                                                                                            |
| Eino B                            | van Duyn   |                       | PhD              | Medisch Spectrum Twente             | Enschede, Netherlands                    |                                                         |                                                                                            |
| Walter JB                         | Mastboom   |                       | PhD              | Medisch Spectrum Twente             | Enschede, Netherlands                    |                                                         |                                                                                            |
| Leonie JM                         | Mekenkamp  |                       | PhD              | Medisch Spectrum Twente             | Enschede, Netherlands                    |                                                         |                                                                                            |
